# Supplementary material
Source: PubMed Central journal article supplement (PMC5310967)
Supplement: NIHMS835825-supplement-Supporting_Information.pdf [file NIHMS835825-supplement-Supporting_Information.pdf]

## Supporting Information

### **Versatile nano-delivery platform to maximize siRNA combination therapy**

*Seung Koo Lee, Benedict Law and Ching-Hsuan Tung\**

Molecular Imaging Innovations Institute  
Department of Radiology, Weill Cornell Medicine  
413 East 69th Street, Box 290, New York, NY 10021, USA  
E-mail: cht2018@med.cornell.edu

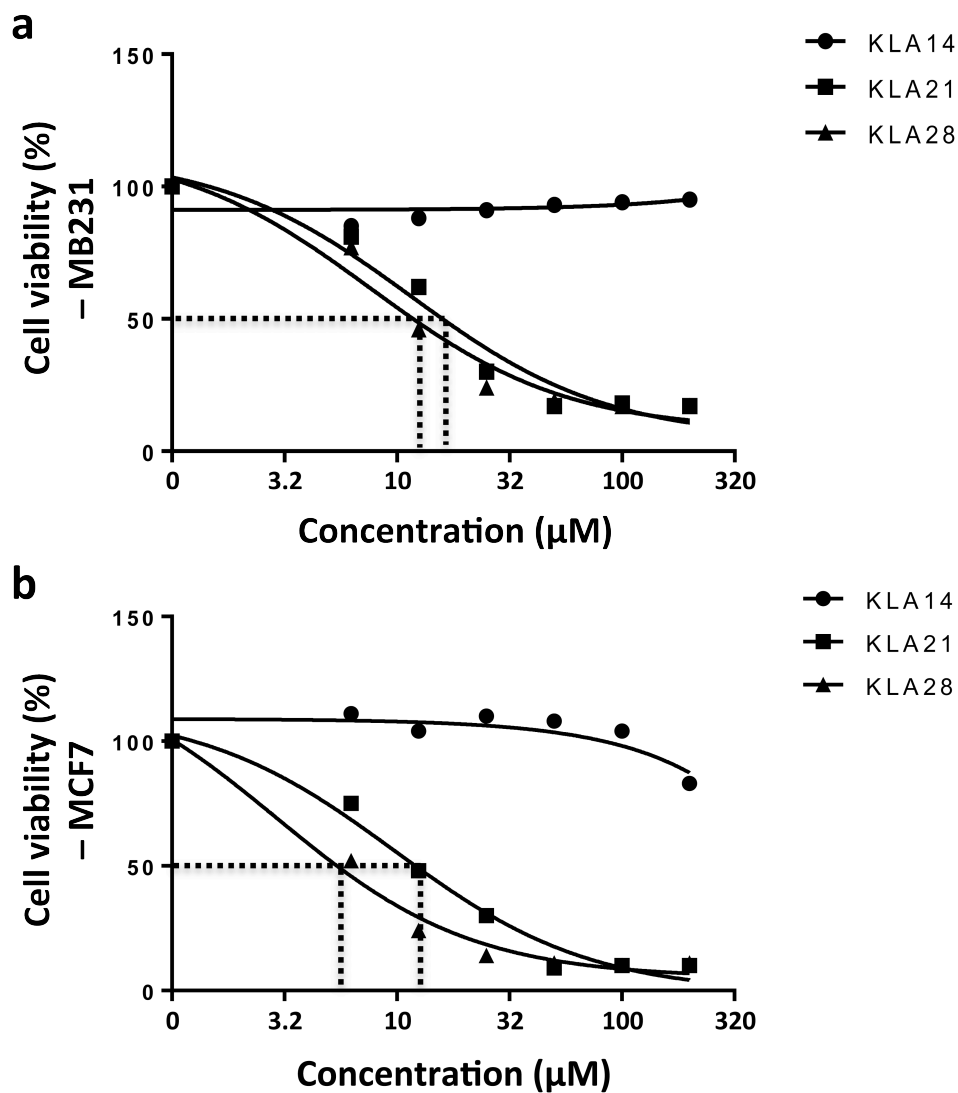

**Figure S1.** Cytotoxicity of KLA analogues. Cell viability was evaluated two days after treatment with various KLA peptides (KLA<sub>14</sub>, KLA<sub>21</sub> and KLA<sub>28</sub>) for 12 h by cell proliferation assay in (a) MDA-MB231 and (b) MCF7 cells.

**a**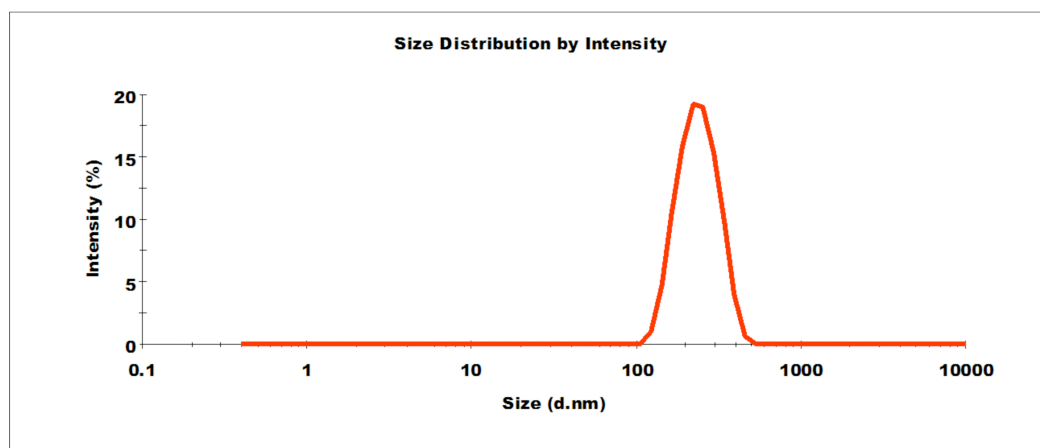**b**

| Au          | Au/K        | Au/K/siR    | Au/K/siR/L  | Au/K/siR/L/HA |
|-------------|-------------|-------------|-------------|---------------|
| 0.178±0.023 | 0.236±0.076 | 0.265±0.033 | 0.266±0.093 | 0.278±0.099   |

**Figure S2.** The size distribution and polydispersity index (PDI) of prepared nanoparticles.

The size distribution of Au/K/siR/L/HA particles (a) and PDI of each prepared nanoparticles (b) were measured by DLS.

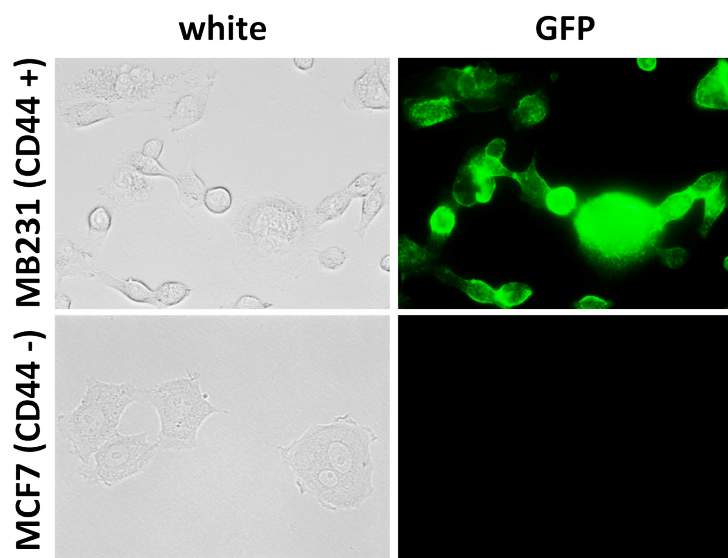

**Figure S3.** Validation of CD44 expression in MDA-MB231 and MCF7 cells. Cells were incubated with an Alexa 488-CD44 antibody for 30 min, and then imaged under fluorescence microscope. Fluorescence signal was only seen in the CD44 positive MDA-MB231 cells.

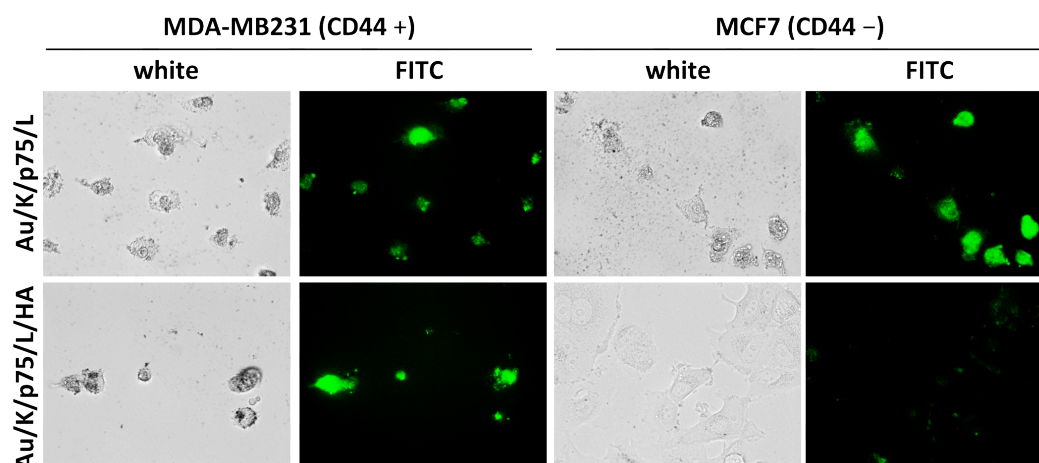

**Figure S4.** Target-specific delivery and therapeutic effect of TFN. The fluorescence signal of FITC-conjugated KLA peptide (KLA<sub>28</sub>-FITC) was examined at day 2 after incubation with non-HA or HA-layered nanocomplexes (KLA<sub>28</sub>-FITC: 1.6  $\mu$ M, siR-p75: 0.12  $\mu$ M) for 12 h using fluorescence microscopy in MDA-MB231 and MCF7 cells. The cells with KLA signal also showed signs of apoptosis.
